# Supplementary material
Source: Frontiers journal article supplement (https://www.frontiersin.org/articles/467454)

Pre-treatment

Axial

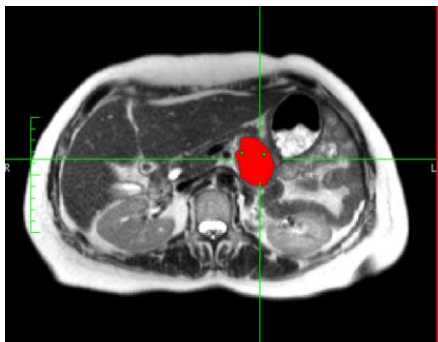

Coronal

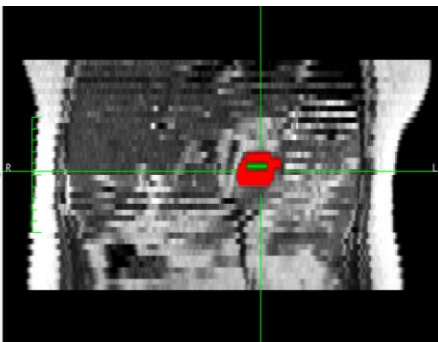

Sagittal

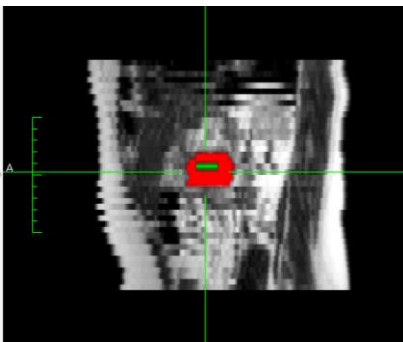

Volume Render

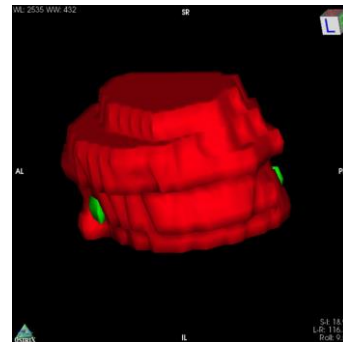

Total vol. = 29 ml

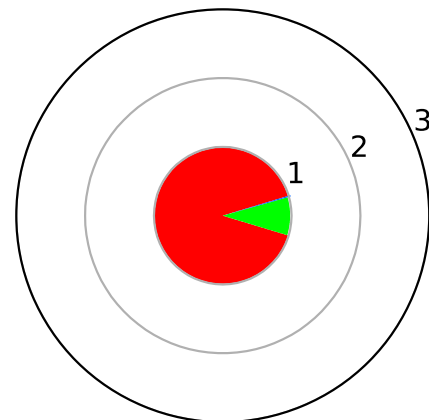

ADC ( $\times 10^{-3} \text{ mm}^2/\text{s}$ )

Post-treatment

Axial

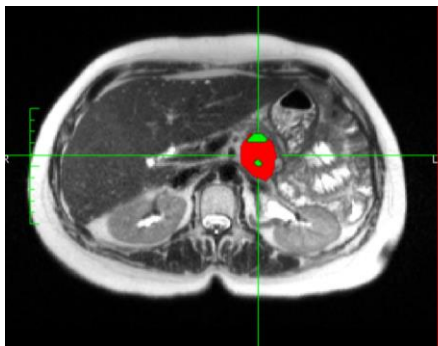

Coronal

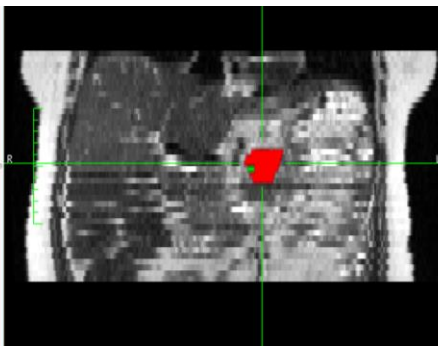

Sagittal

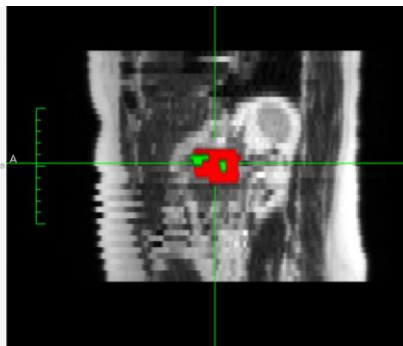

Volume Render

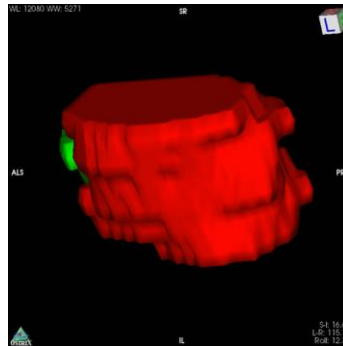

Total vol. = 26 ml

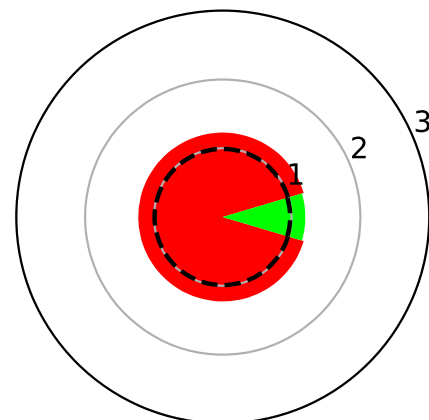

ADC ( $\times 10^{-3} \text{ mm}^2/\text{s}$ )

Pre-treatment

Axial

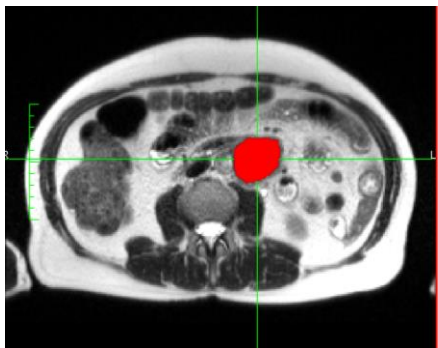

Coronal

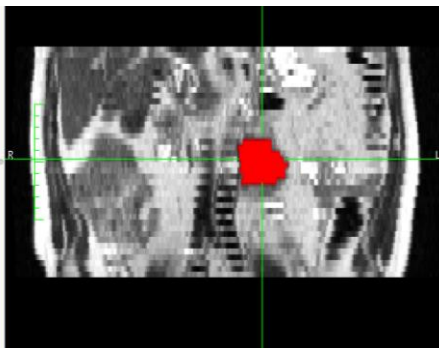

Sagittal

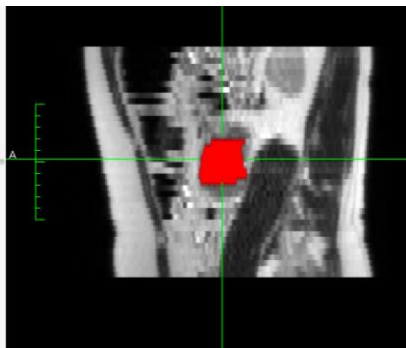

Volume Render

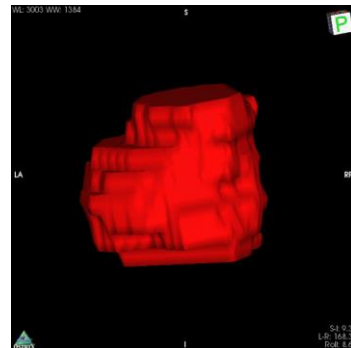

Total vol. = 44 ml

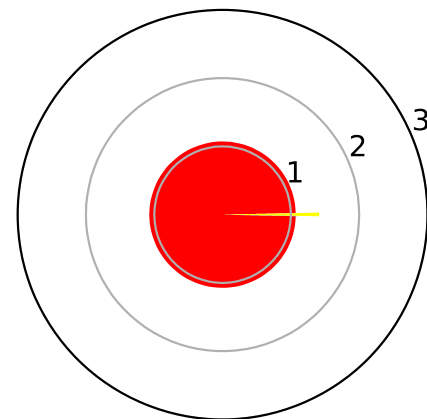

ADC ( $\times 10^{-3} \text{ mm}^2/\text{s}$ )

Post-treatment

Axial

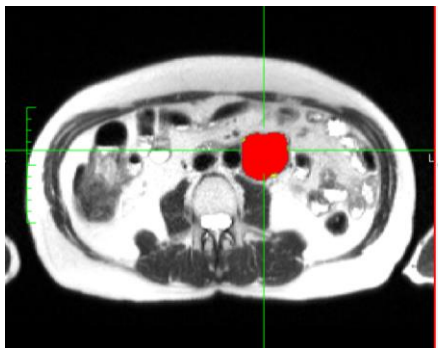

Coronal

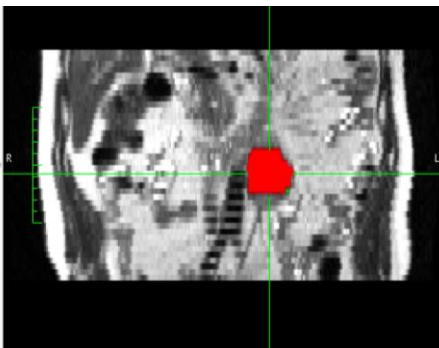

Sagittal

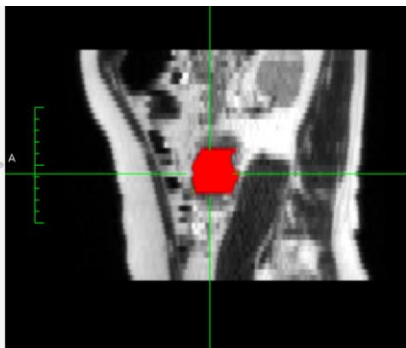

Volume Render

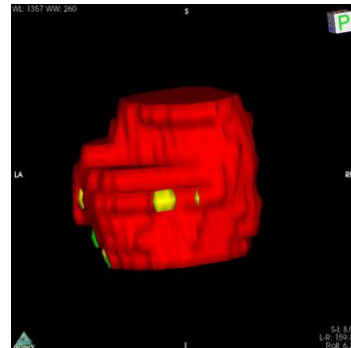

Total vol. = 43 ml

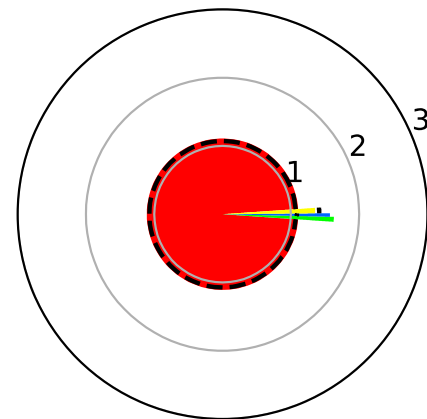

ADC ( $\times 10^{-3} \text{ mm}^2/\text{s}$ )

Pre-treatment

Axial

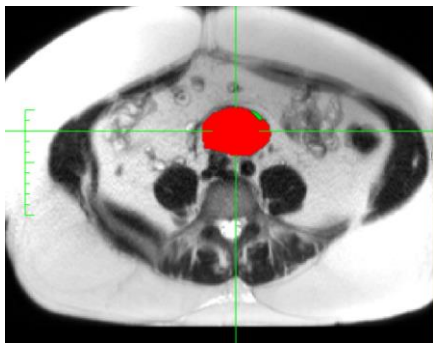

Coronal

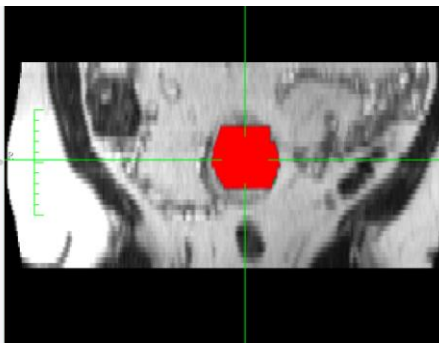

Sagittal

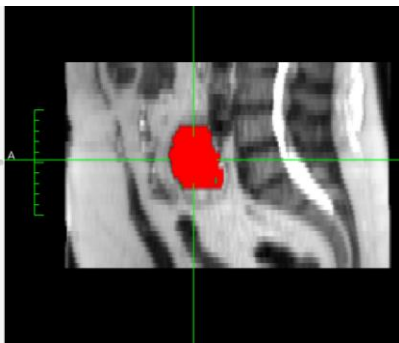

Volume Render

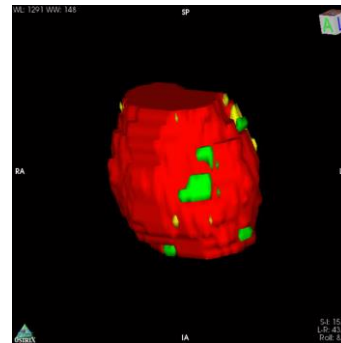

Total vol. = 116 ml

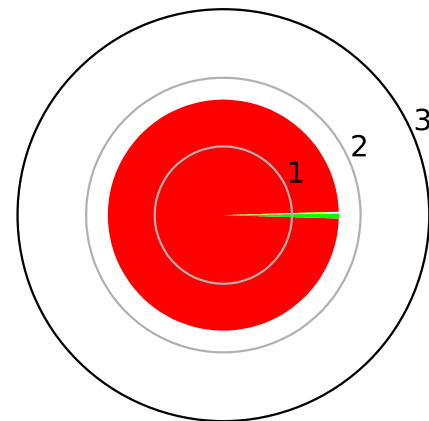

ADC ( $\times 10^{-3} \text{ mm}^2/\text{s}$ )

Post-treatment

Axial

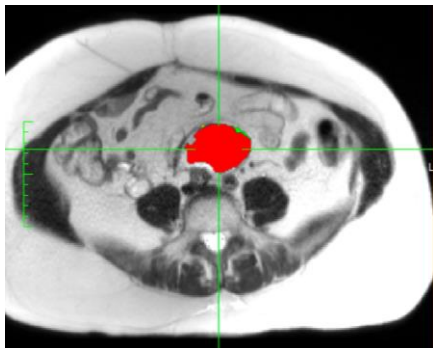

Coronal

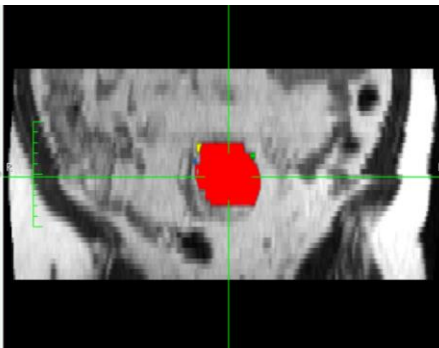

Sagittal

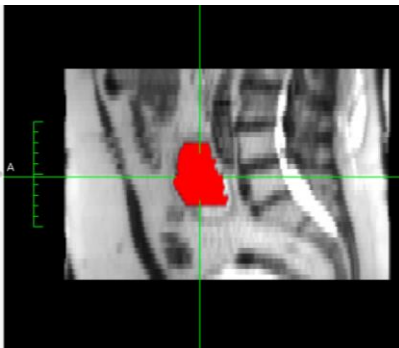

Volume Render

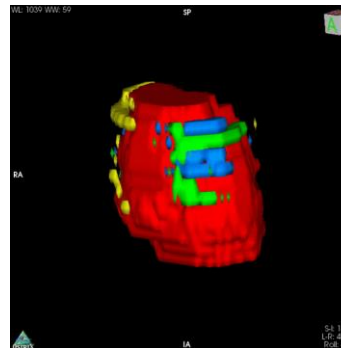

Total vol. = 102 ml

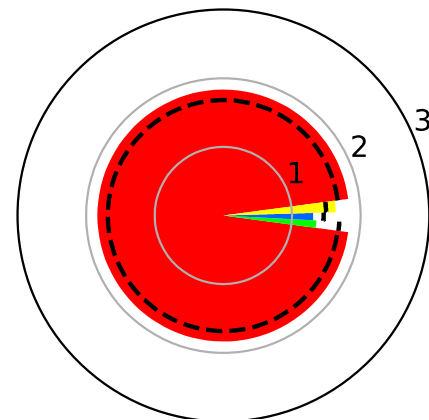

ADC ( $\times 10^{-3} \text{ mm}^2/\text{s}$ )

Pre-treatment

Axial

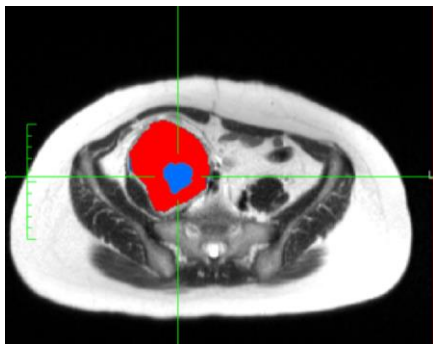

Coronal

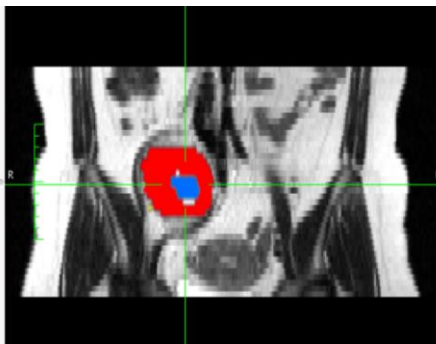

Sagittal

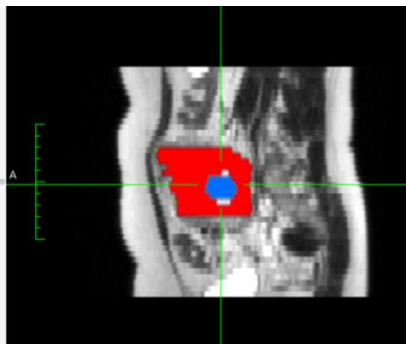

Volume Render

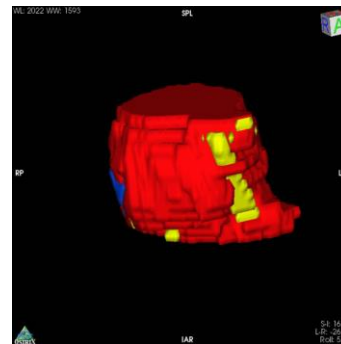

Total vol. = 197 ml

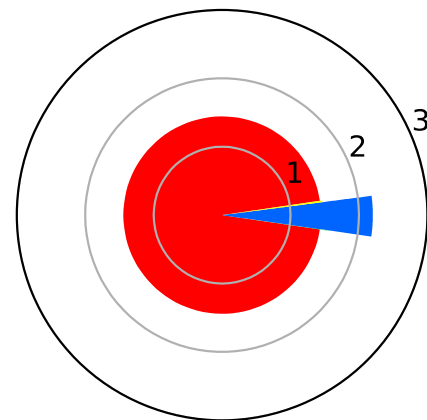

ADC ( $\times 10^{-3} \text{ mm}^2/\text{s}$ )

Post-treatment

Axial

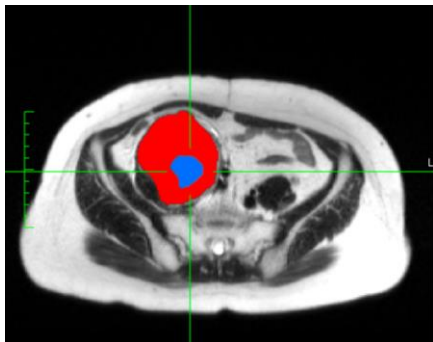

Coronal

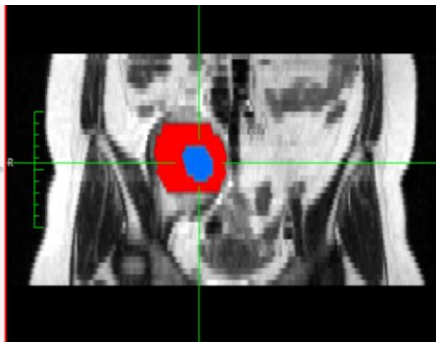

Sagittal

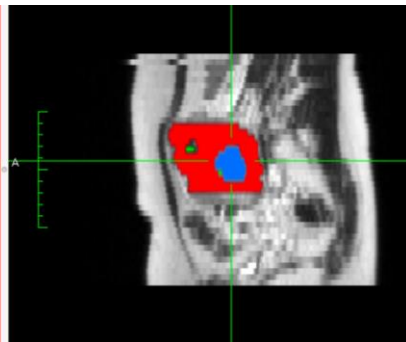

Volume Render

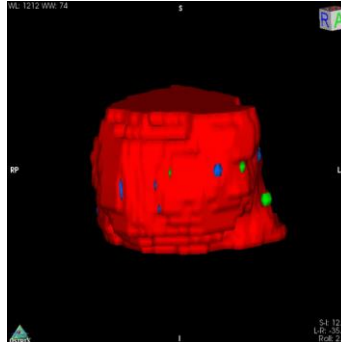

Total vol. = 206 ml

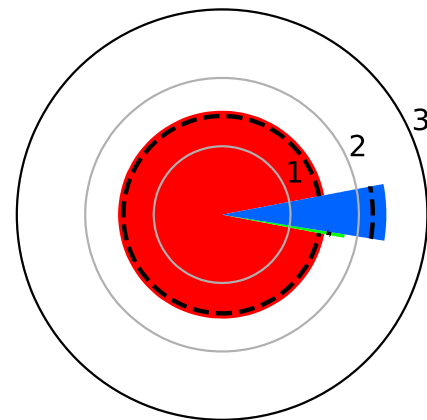

ADC ( $\times 10^{-3} \text{ mm}^2/\text{s}$ )



Pre-treatment

Axial

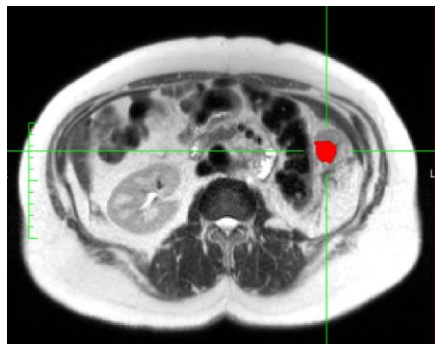

Coronal

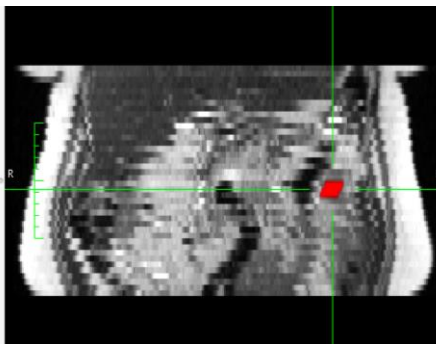

Sagittal

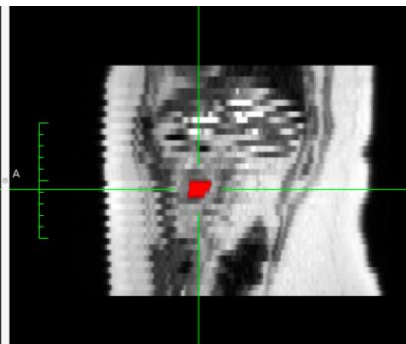

Volume Render

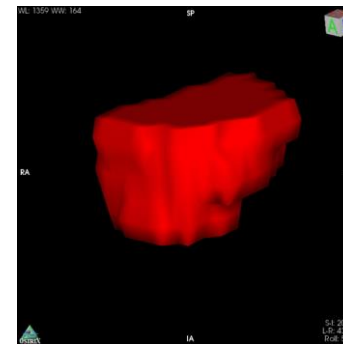

Total vol. = 197 ml

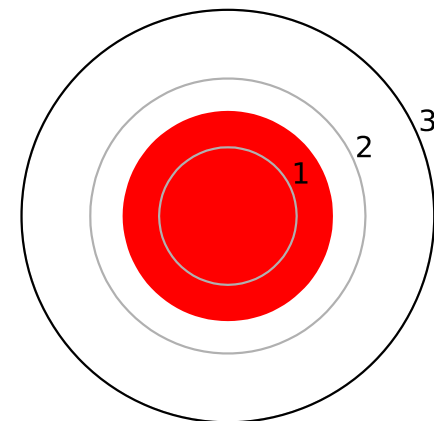

ADC ( $\times 10^{-3} \text{ mm}^2/\text{s}$ )

Post-treatment

Axial

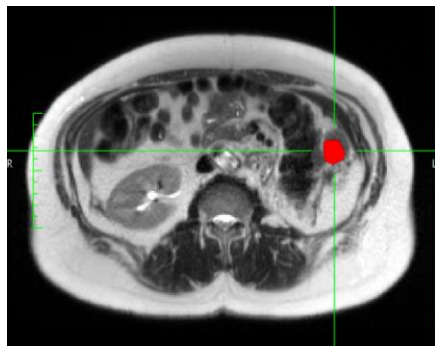

Coronal

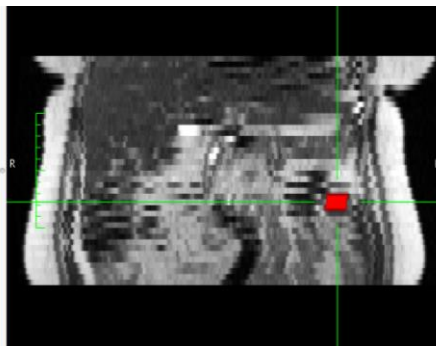

Sagittal

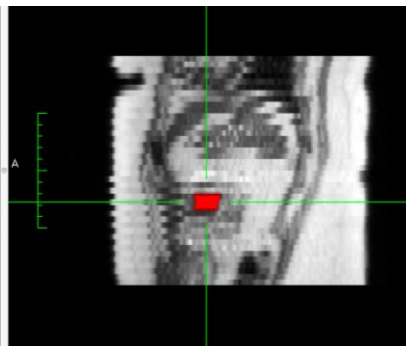

Volume Render

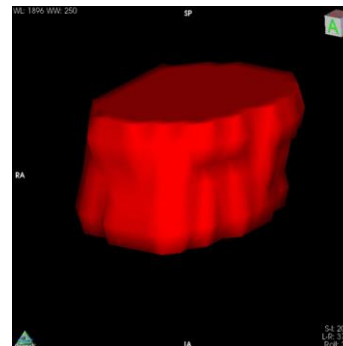

Total vol. = 206 ml

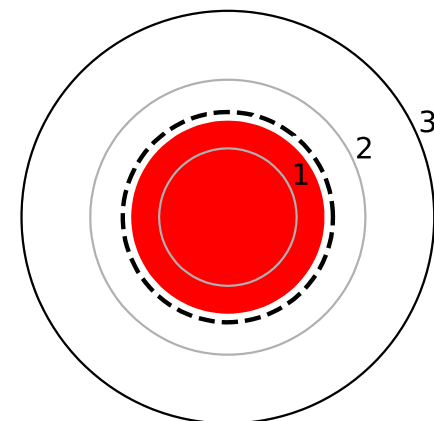

ADC ( $\times 10^{-3} \text{ mm}^2/\text{s}$ )

Pre-treatment

Axial

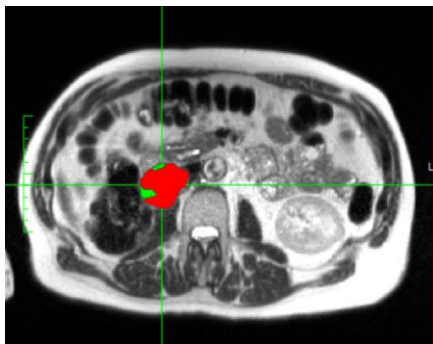

Coronal

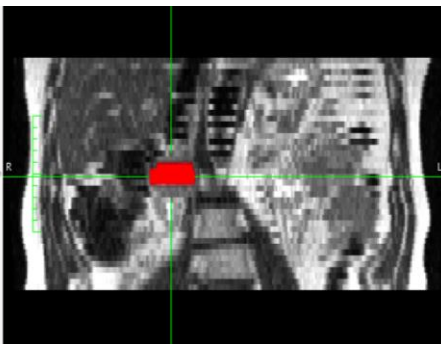

Sagittal

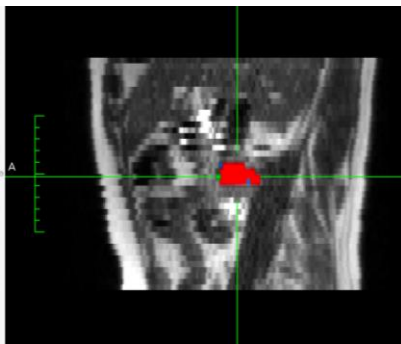

Volume Render

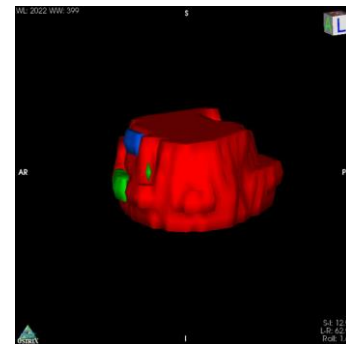

Total vol. = 20 ml

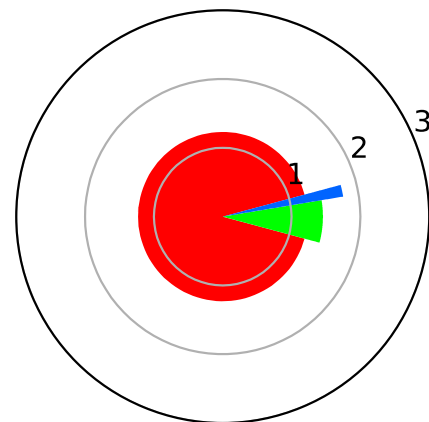

ADC ( $\times 10^{-3} \text{ mm}^2/\text{s}$ )

Post-treatment

Axial

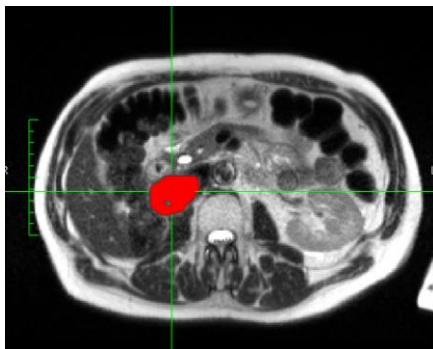

Coronal

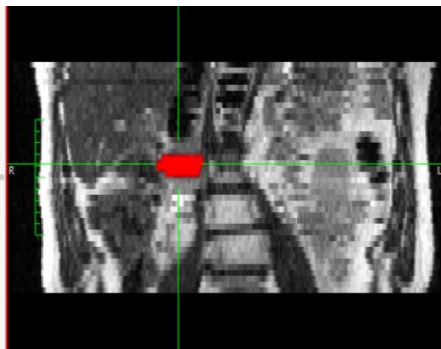

Sagittal

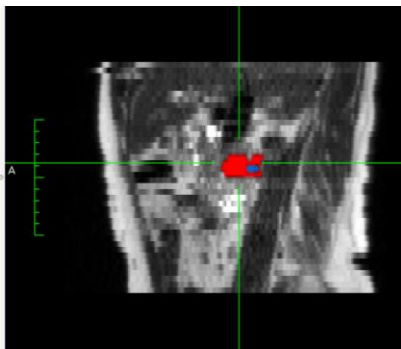

Volume Render

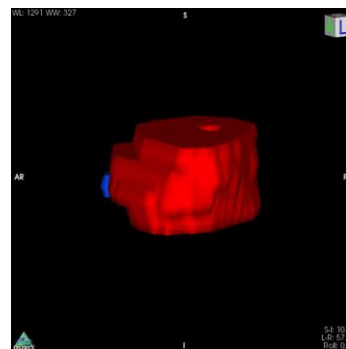

Total vol. = 20 ml

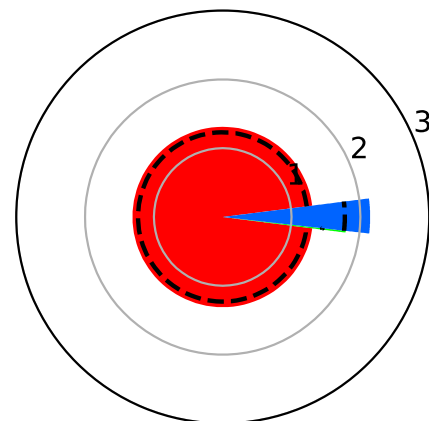

ADC ( $\times 10^{-3} \text{ mm}^2/\text{s}$ )

Pre-treatment

Axial

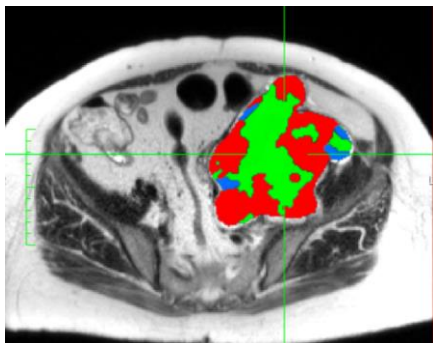

Coronal

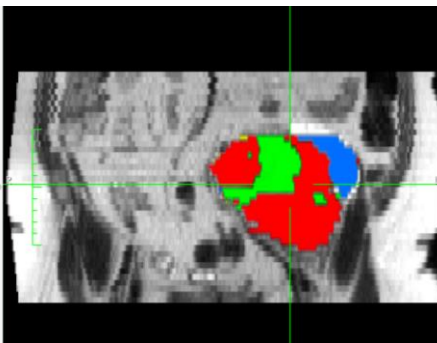

Sagittal

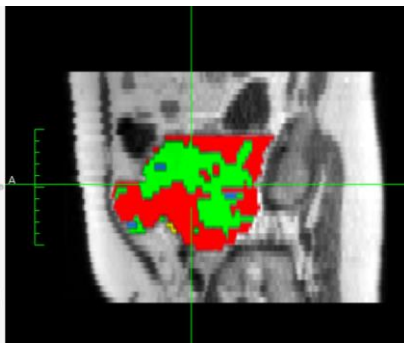

Volume Render

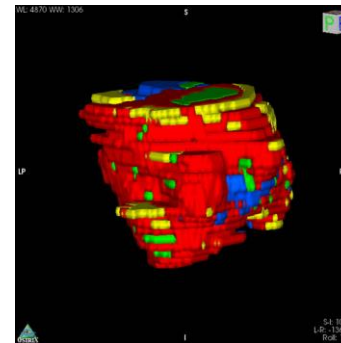

Total vol. = 690 ml

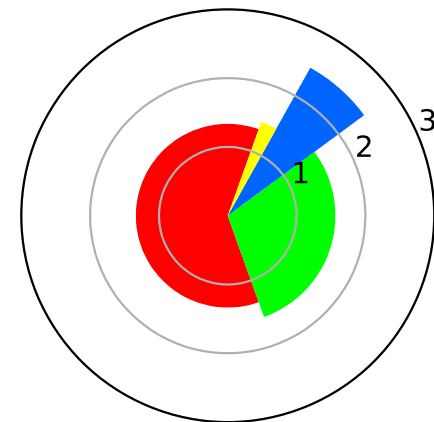

ADC ( $\times 10^{-3} \text{ mm}^2/\text{s}$ )

Post-treatment

Axial

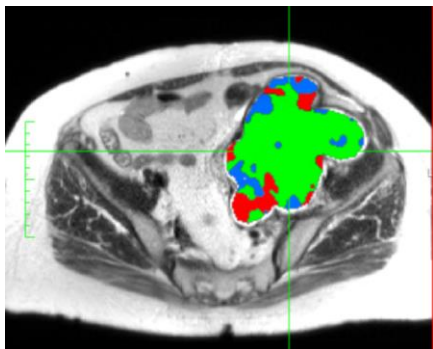

Coronal

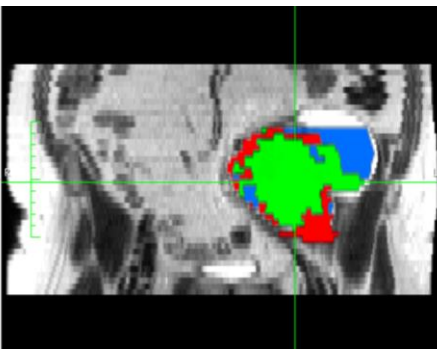

Sagittal

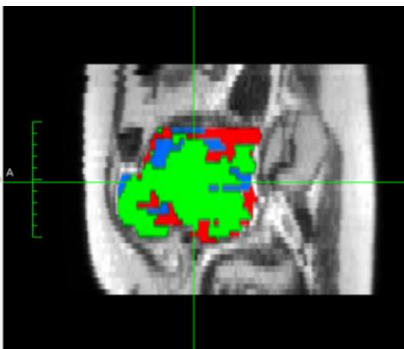

Volume Render

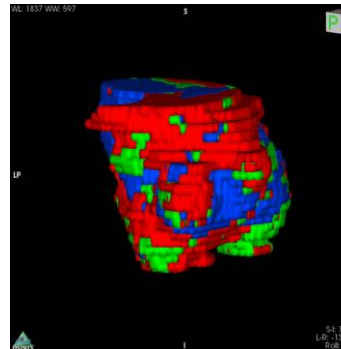

Total vol. = 657 ml

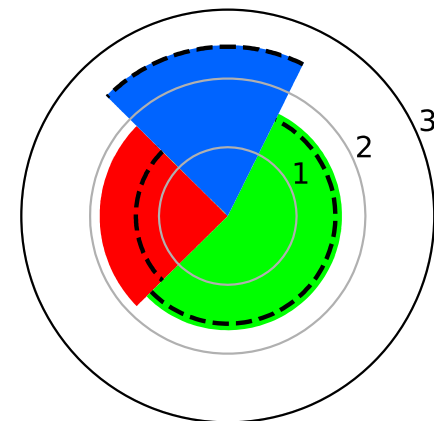

ADC ( $\times 10^{-3} \text{ mm}^2/\text{s}$ )

Pre-treatment

Axial

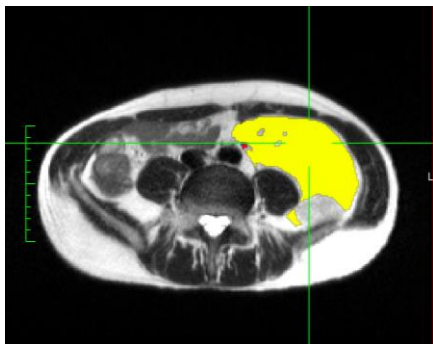

Coronal

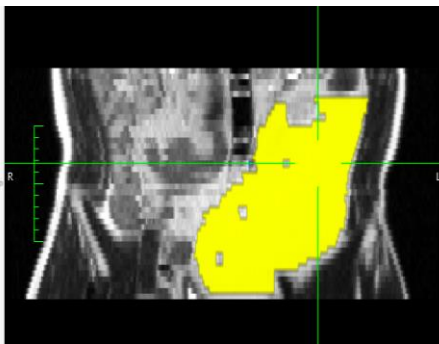

Sagittal

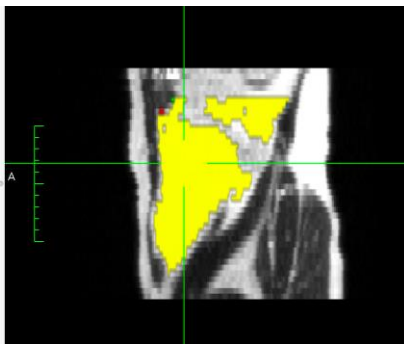

Volume Render

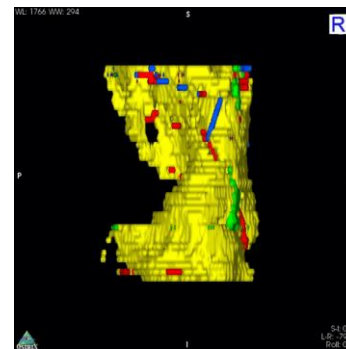

Total vol. = 920 ml

Axial

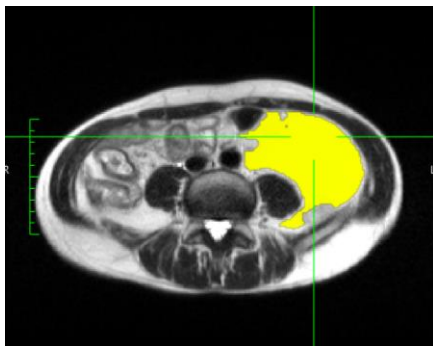

Coronal

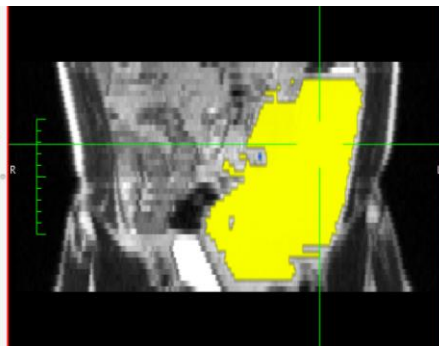

Sagittal

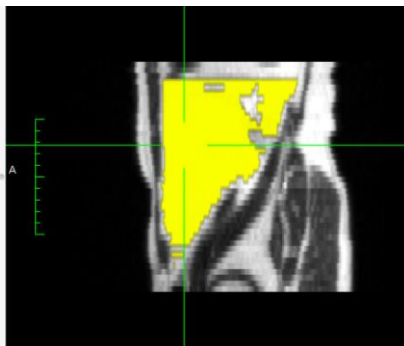

Volume Render

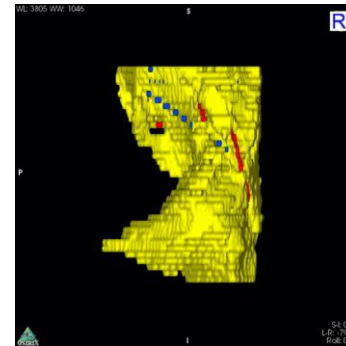

Total vol. = 1007 ml

## Habitat Classification Scheme

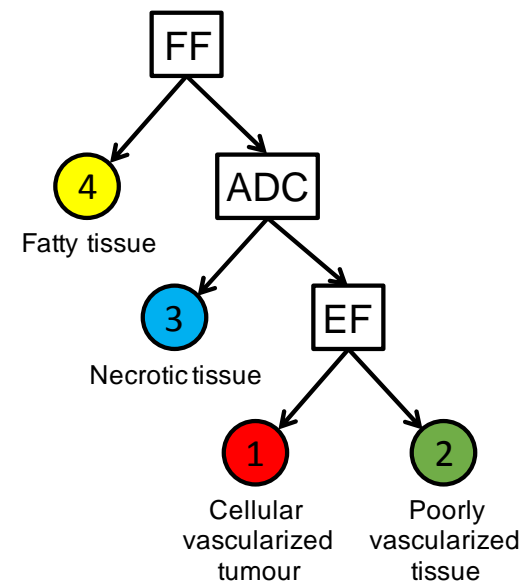

Supplement: Data_Sheet_3.PDF [file Data_Sheet_3.PDF]
